# Supplementary material for: Identification of tryptophan metabolism-related genes in immunity and immunotherapy in Alzheimer’s disease
Source: publisher site journal article supplement (doi:10.18632/aging.205220), 2023-11-20
Supplement: Supplementary file [file aging-v15i22-205220-supplementary-material-SD1.pdf]

SUPPLEMENTARY FIGURES

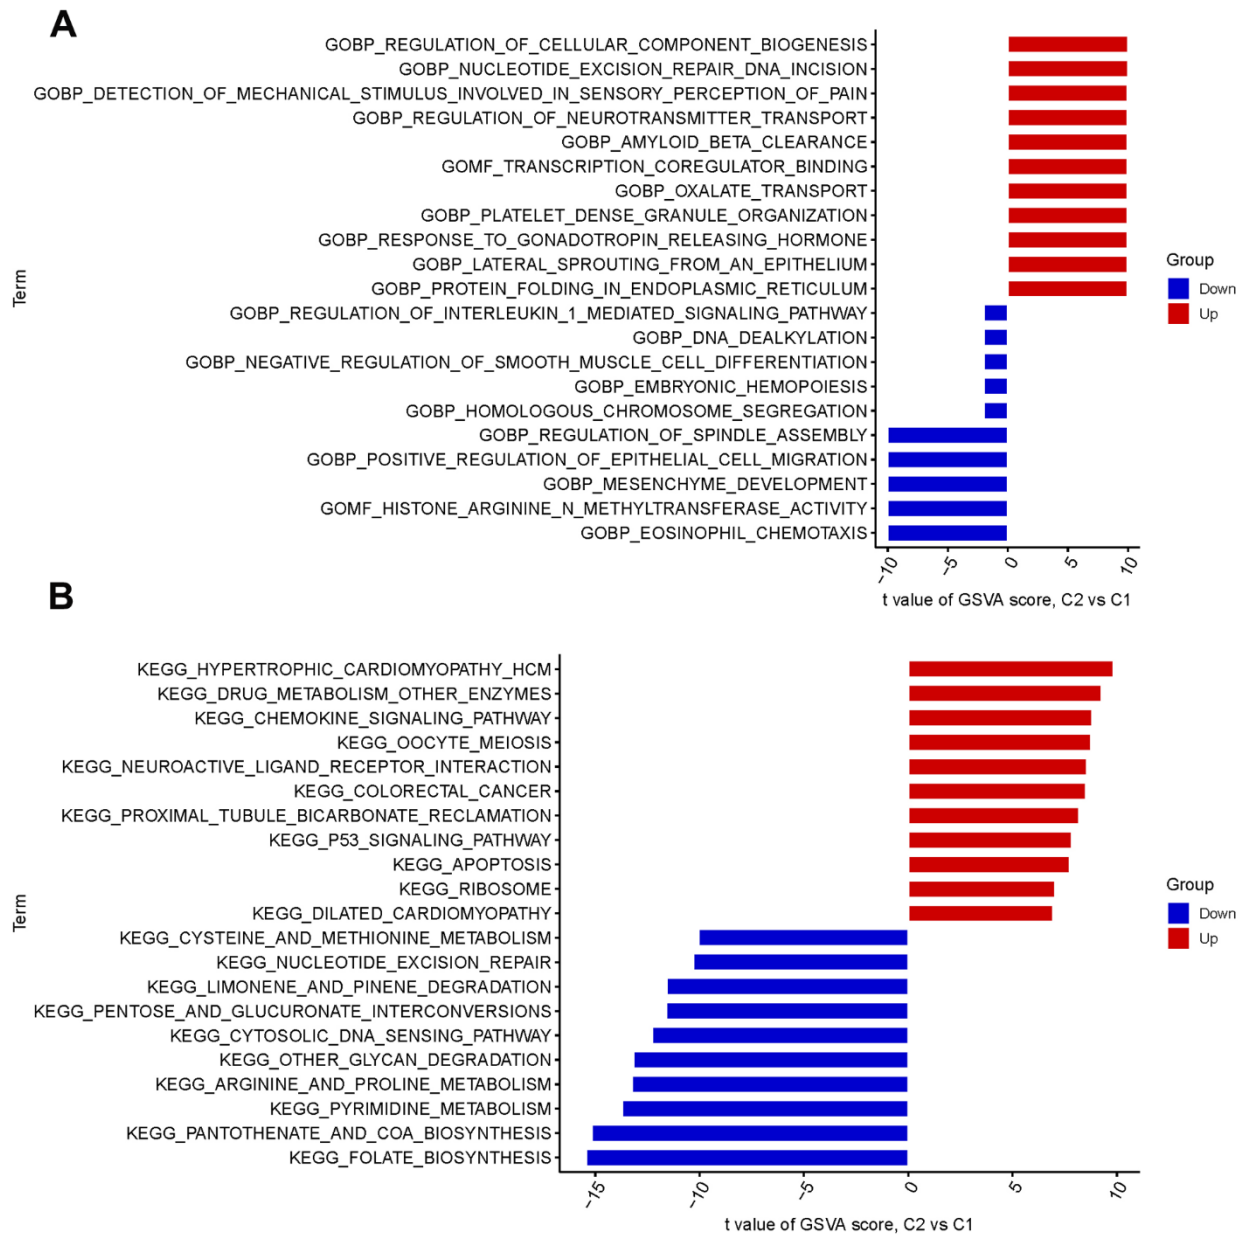

**Supplementary Figure 1. Enrichment analysis for DEGs. (A) GO. (B) KEGG. (A)** Barplot graph for GO enrichment (the longer bar means the more genes enriched; q-value: the adjusted p-value). **(B)** Barplot graph for KEGG pathways (the longer bar means the more genes enriched).

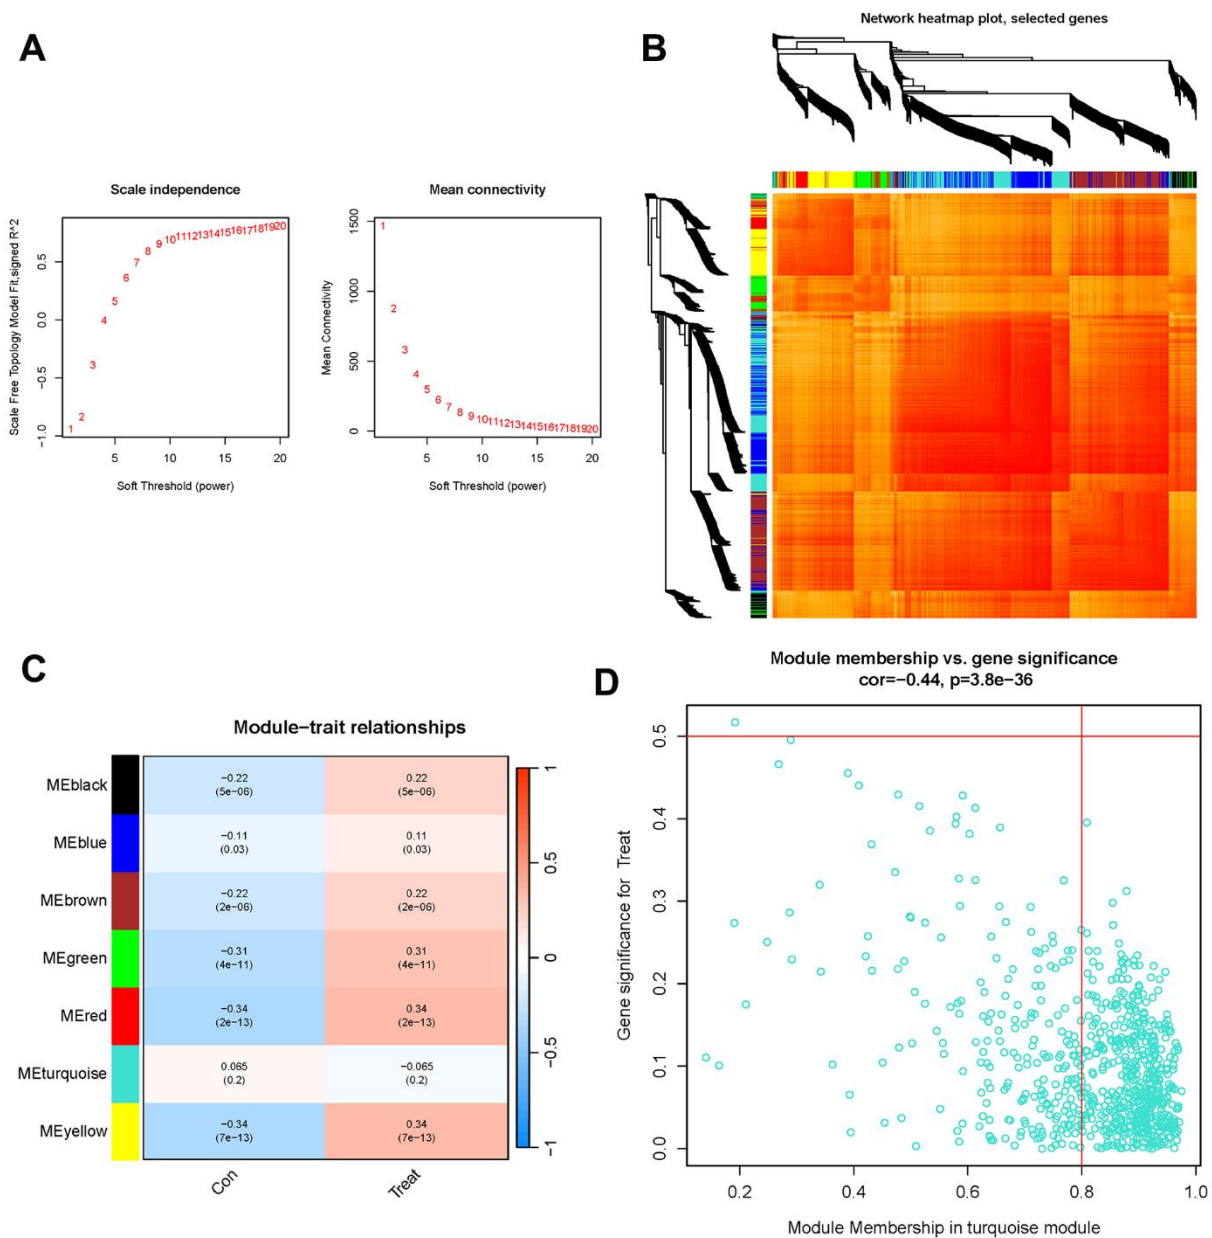

**Supplementary Figure 2. Co-expression module construction.** (A) Soft threshold power mean connection and scale-free fitting index analysis. (B) Clustering of dendrograms according to dynamic tree cutting, the genes were sorted into distinct modules using hierarchical clustering with a threshold of 0.25. Each color represents a separate module. (C) Heatmap of correlations between module eigengenes and clinical characteristics. (D) Gene scatterplot in the turquoise module.

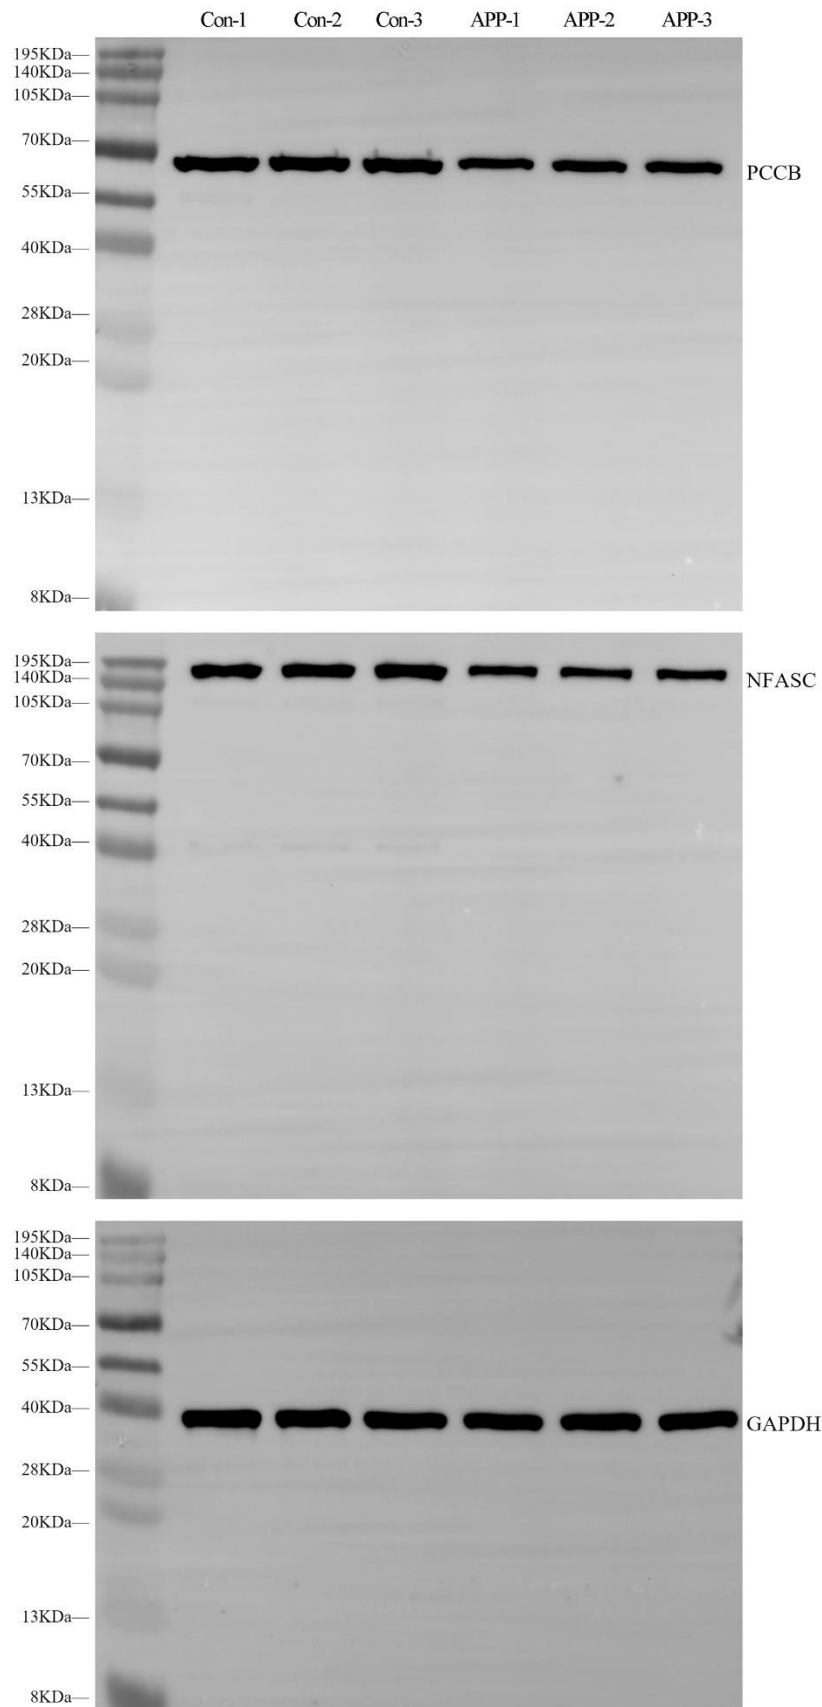

Supplementary Figure 3. The original image of Western blotting.
